# Supplementary material for: Tailoring the optical properties of rubrene films through epitaxy-induced amorphous-to-crystal transition
Source: Royal Society of Chemistry journal article supplement (doi:10.1039/d4tc01618a), 2024-01-01
Supplement: d4tc01618a1.pdf [file d4tc01618a1.pdf]

## Electronic Supplementary Information for

# “Tailoring the optical properties of rubrene films through epitaxy-induced amorphous-to-crystal transition”

*Silvia Trabattoni, Luisa Raimondo, \* Alessandro Minotto, \* Angelo Monguzzi, Francesco  
Meinardi, Adele Sassella*

Department of Materials Science, University of Milano-Bicocca, via Cozzi 55, I-20125, Milano,  
Italy

\* [luisa.raimondo@unimib.it](mailto:luisa.raimondo@unimib.it); [alessandro.minotto@unimib.it](mailto:alessandro.minotto@unimib.it)

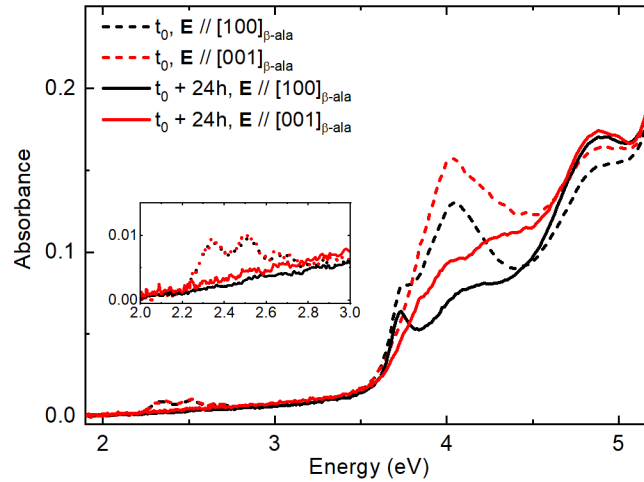

**Fig. S1** Absorption spectra collected at normal incidence with polarized light on the same film reported in Figure 1a (3 nm,  $t_s = 24\text{h}$ ). The spectra were collected after few hours from extraction ( $t_0$ , dotted lines) and after 24h ( $t_0+24\text{h}$ , full lines).

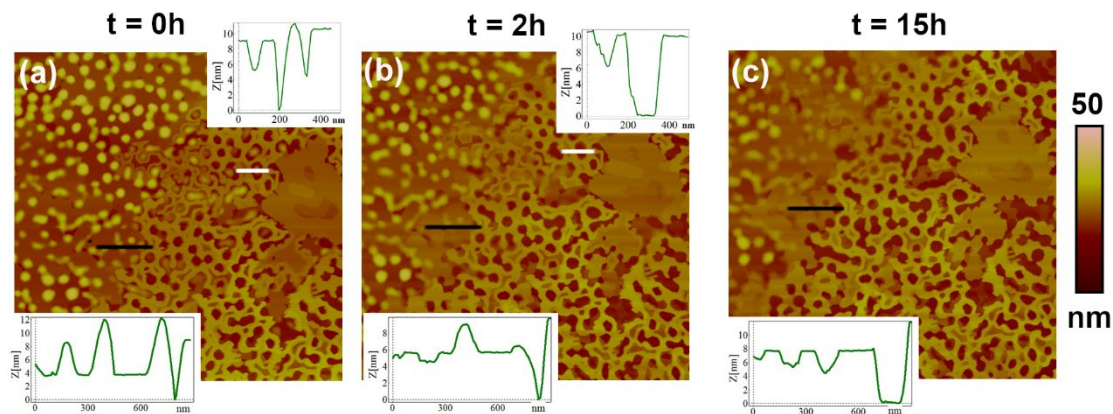

**Fig. S2** AFM height images of the same ( $5 \times 5$ )  $\mu\text{m}^2$  area acquired after different time of air exposure: as extracted ( $t = 0\text{ h}$ ) (a),  $t = 2\text{ h}$  (b), and  $t = 15\text{ h}$  (c). The image at  $t = 0\text{ h}$  is the same reported in Figure 2. The section profiles have been reported as measured along the white and black lines.
